# Supplementary material
Source: PubMed Central journal article supplement (PMC8028679)
Supplement: BPA-29-782-s002.pdf [file BPA-29-782-s002.pdf]

**Supplementary figure 1**

**A. Case 1 (Low power)**

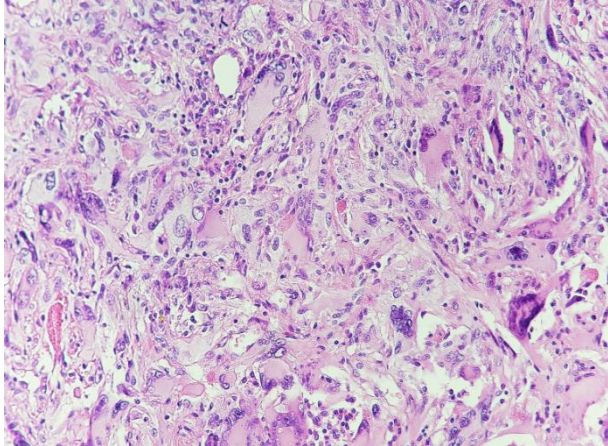

**D. Case 4 (Low power)**

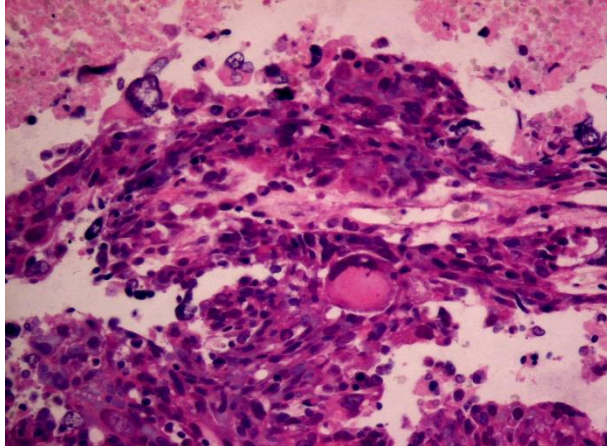

**B. Case 2 (Low power)**

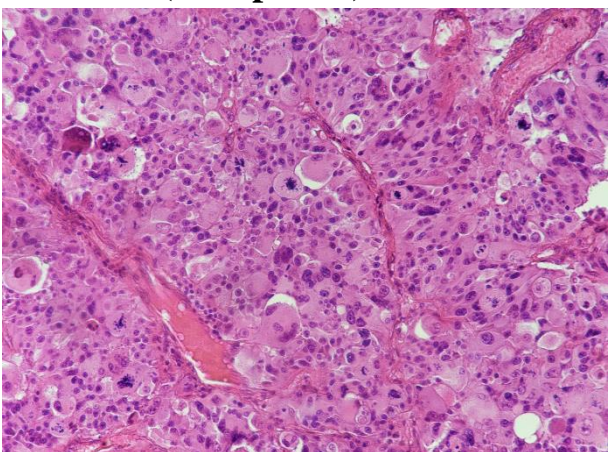

**E. Case 5 (Low power)**

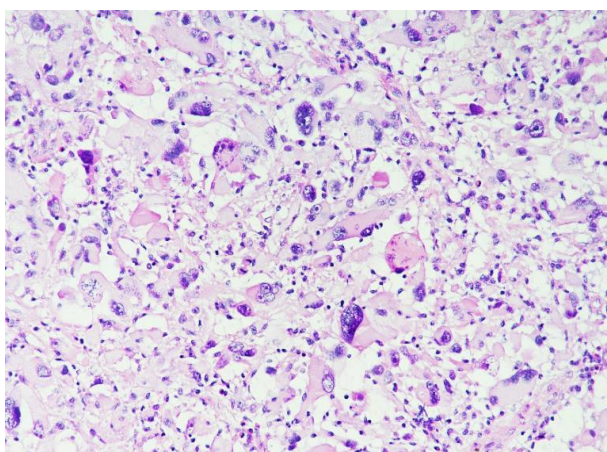

**C. Case 3 (Low power)**

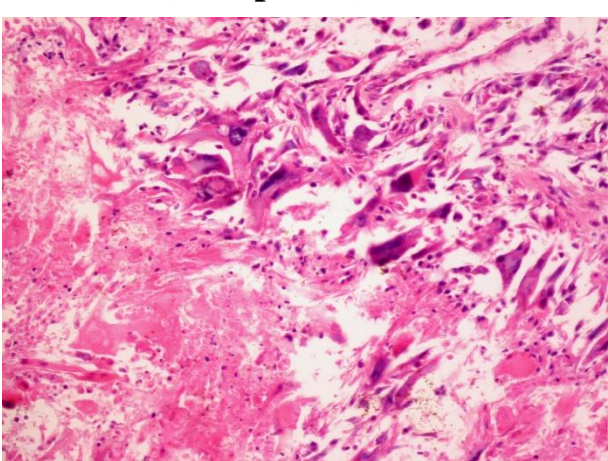

**F. Case 6 (Low power)**

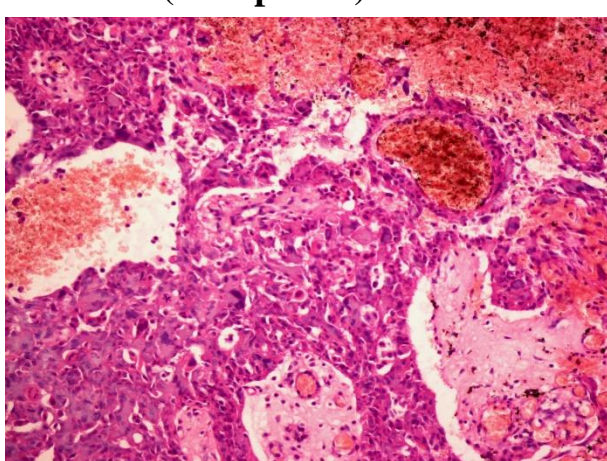

## Supplementary figure 1

**G. Case 7 (Low power)**

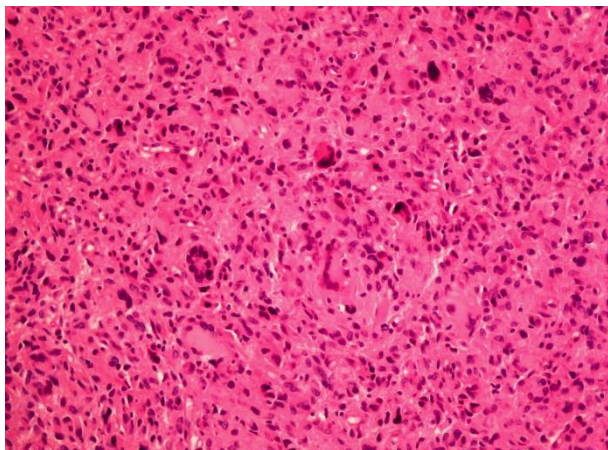

**I. Case 9 (Low power)**

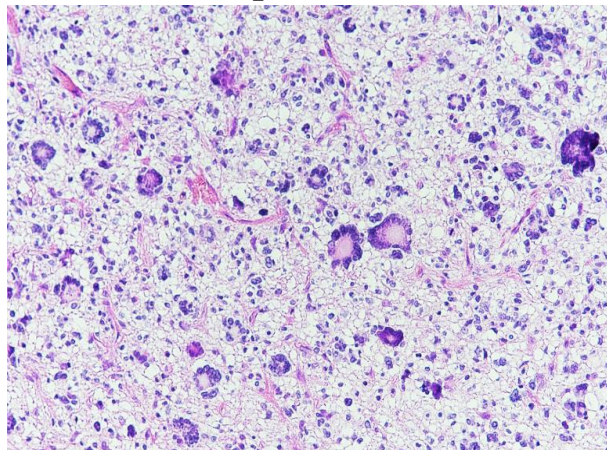

**H. Case 8 (Low power)**

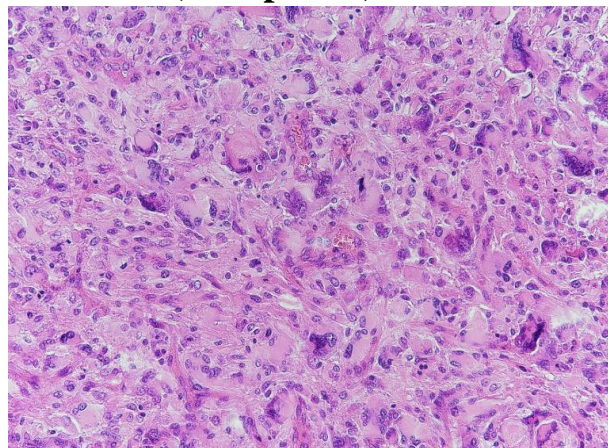

**J. Case 10 (Low power)**

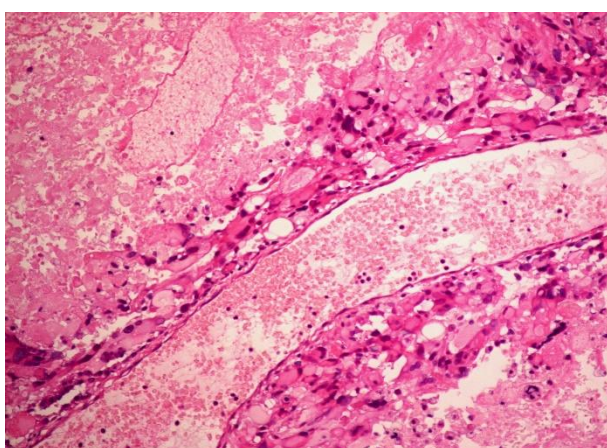

**Supplementary figure 1**

**K. Case 1 (High power)**

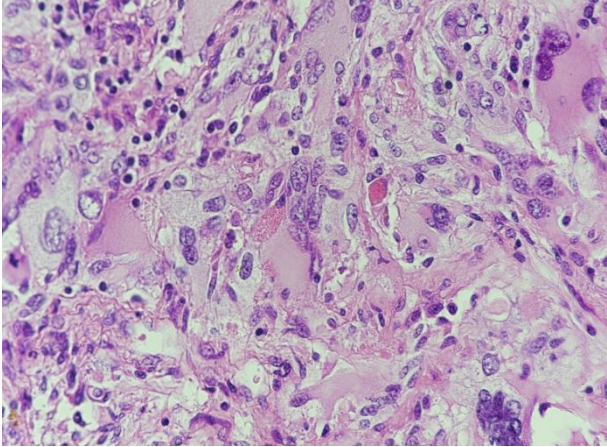

**N. Case 4 (High power)**

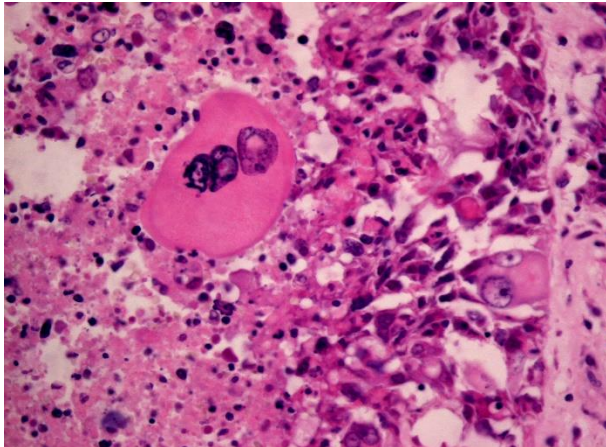

**L. Case 2 (High power)**

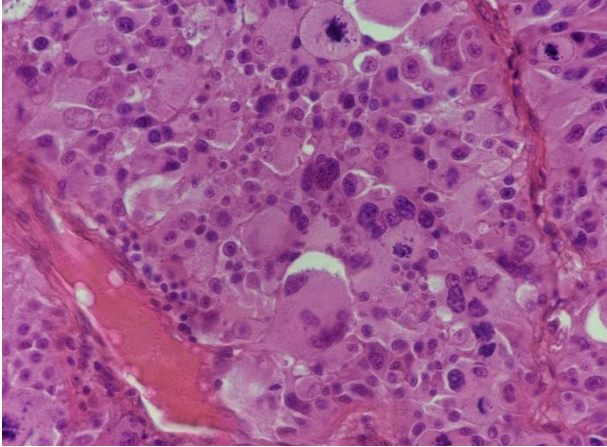

**O. Case 5 (High power)**

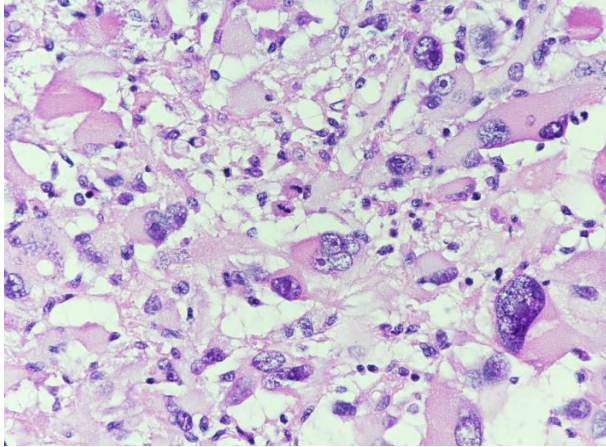

**M. Case 3 (High power)**

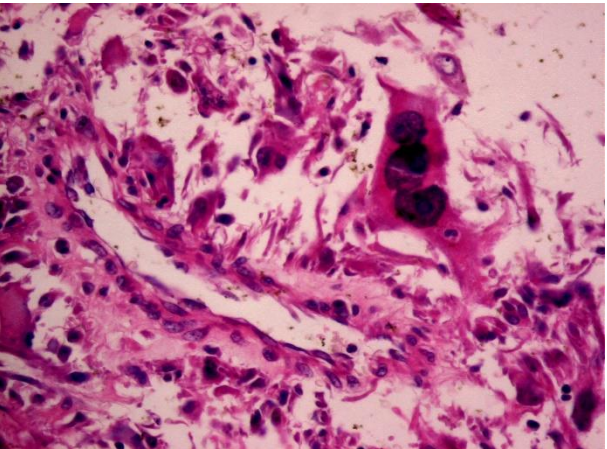

**P. Case 6 (High power)**

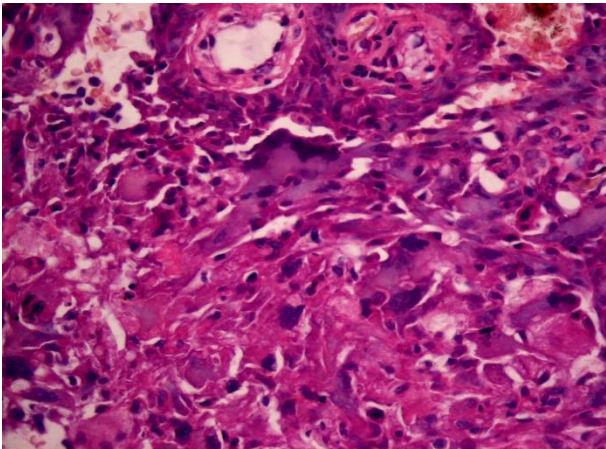

**Supplementary figure 1**

**Q. Case 7 (High power)**

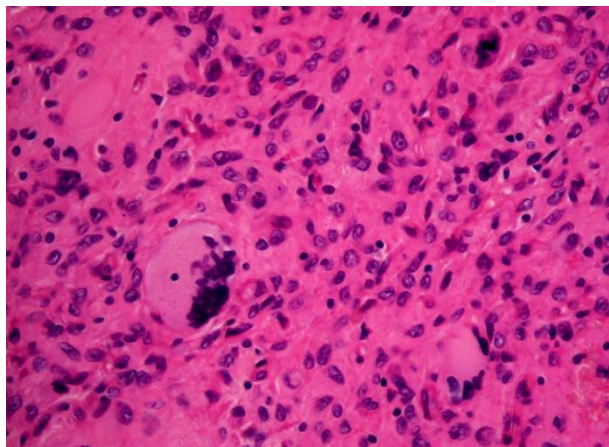

**S. Case 9 (High power)**

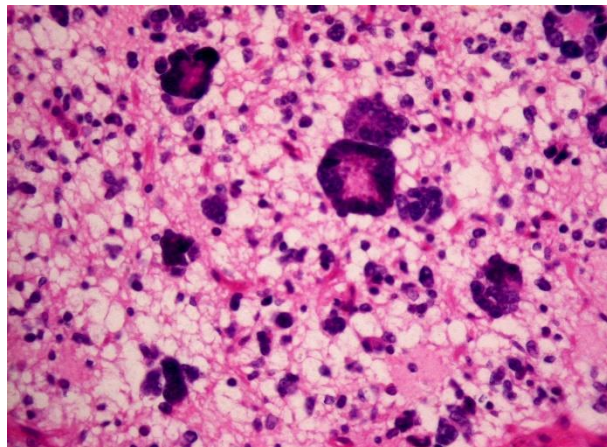

**R. Case 8 (High power)**

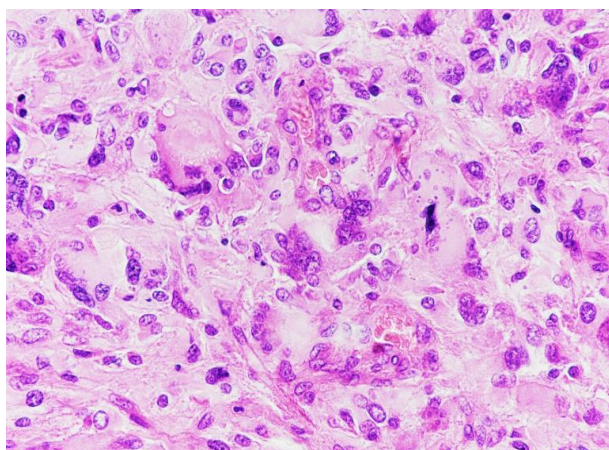

**T. Case 10 (High power)**

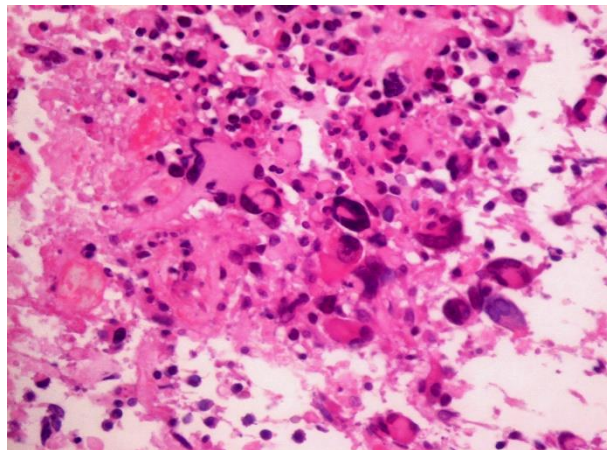

## Supplementary figure 2

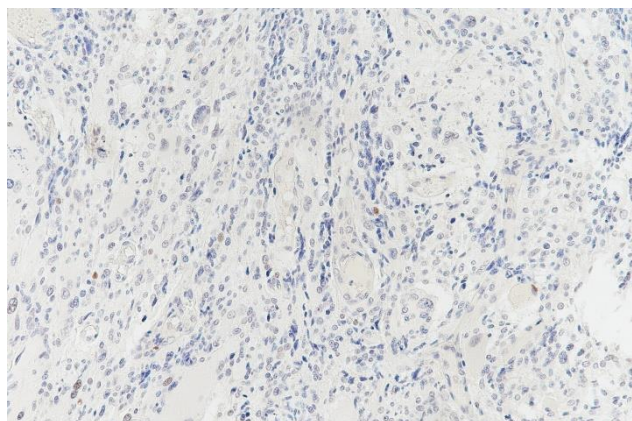

(H3K36me3 negative, low power)

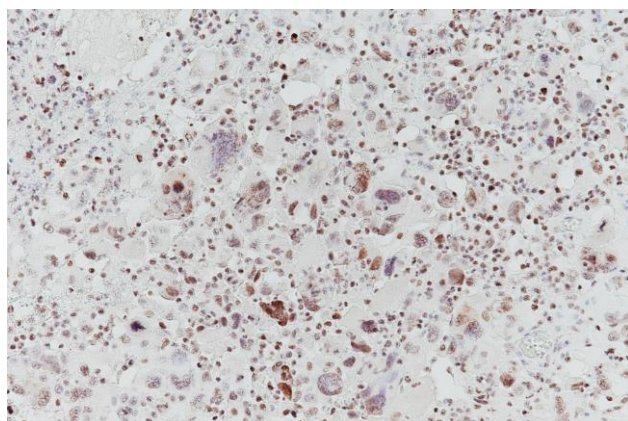

(H3K36me3 positive, low power)

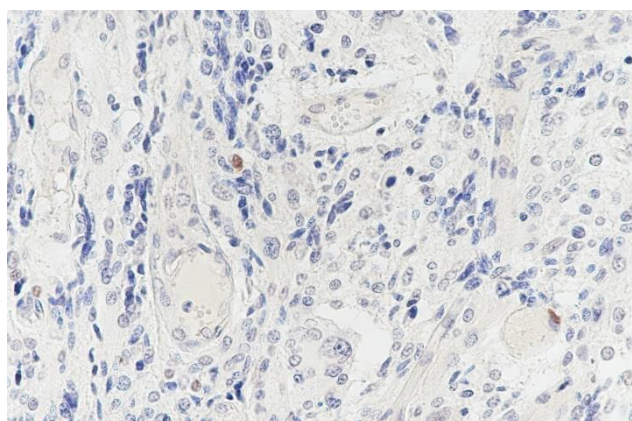

(H3K36me3 negative, high power)

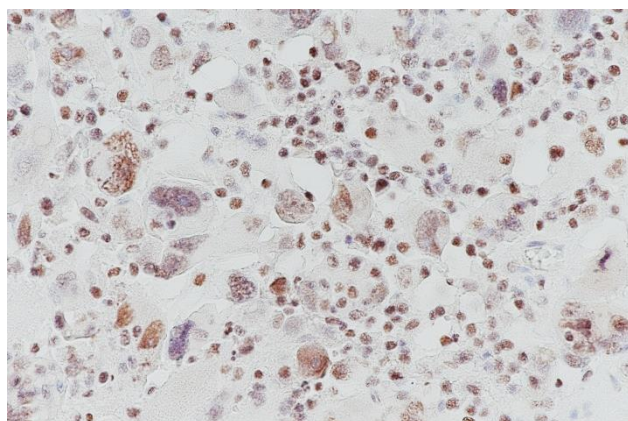

(H3K36me3 positive, high power)
